# Supplementary material
Source: Research Square preprint supplement (doi:10.21203/rs.3.rs-8831037/v1)
Supplement: Supplementary file 1 [file b79d2887f21a95a1b994f05a.docx]

Research title: Assessing public understanding of haemoglobinopathy screening.

DEMOGRAPHICS

1. Age
2. 18-24
3. 25-29
4. 30-34
5. 35-39
6. 40-44
7. 45-49
8. 50+
9. Ethnic Origin
10. African/African-Caribbean
11. Indian sub-continent (Pakistan, India, Bangladesh)
12. Middle East
13. Southeast Asia & China
14. White European
15. West Asia

|  |
| --- |

1. Other (please state)
2. Kindly state the town or city in which you live?
3. Gender
4. Female
5. Male
6. I do not wish to disclose.

KNOWLEDGE ABOUT HAEMOGLOBINOPATHIES

Haemoglobin is the protein within red blood cells which carries oxygen around the body.

Haemoglobinopathies refer to a group of genetic disorders that affect the structure or production of haemoglobin and this includes disorders such as sickle cell disease and thalassaemia.

1. To your knowledge, have you or your partner ever been tested for a haemoglobinopathy?

Yes No

1. Are there any children in your household?

Yes No

1. In the past ten years, have you or your partner been pregnant?

Yes No

1. Do you believe that you have a good understanding of what haemoglobinopathies are and why screening for them is important?

Yes No Don’t Know

1. Do you think there should be more education about haemoglobinopathy screening in schools and communities?

Yes No Don’t Know

1. Haemoglobinopathies frequently affect diverse groups. Sickle cell disease and thalassaemia is more prevalent in certain groups e.g. those of African, Asian or Mediterranean heritage. If haemoglobinopathy risk is considered minimal in a particular ethnic group, do you think screening would still be beneficial?

Yes No Don’t Know

1. Have you ever participated in a genetic counselling session related to haemoglobinopathies?

Yes No Don’t Know

1. Do you think early diagnosis of haemoglobinopathies is essential for effective management?

Yes No Don’t Know

1. Do you believe that haemoglobinopathies screening is important for public health?

Yes No Don’t Know

1. Do you understand the purpose of genetic screening for haemoglobinopathies?

Yes No Don’t Know

1. In the West Midlands region, almost 2% of pregnancies are affected by haemoglobinopathies, resulting in every pregnant mother being tested for haemoglobinopathies unless the mother declines. Do you agree with this strategy?

Yes No Don’t Know

1. Do you feel adequately informed about the process of haemoglobinopathy screening?

Yes No Don’t Know

1. Would you be willing to participate in community events or discussions about haemoglobinopathy screening?

Yes No Maybe

1. Do you believe there should be a specific age at which haemoglobinopathy screening could be implemented?

Yes No Don’t Know

1. In some countries, couples considering starting a family undergo haemoglobinopathy screening to assess the risk of passing on these hereditary conditions to their children. Would this be beneficial in United Kingdom?

Yes No Don’t Know

1. How can public health officials and healthcare providers strengthen their education and awareness campaigns to increase the general public's comprehension of haemoglobinopathy screening, especially among at-risk groups and ethnic communities?
2. Can you share any concerns or questions you have about haemoglobinopathy screening, or any barriers you think the public might face in accessing it?
3. Have you or anyone you know ever undergone haemoglobinopathy screening? If yes, can you share your experience or what you've heard about the process?
4. How do you think we can address any stigma or fear associated with haemoglobinopathy screening in United Kingdom?
5. Do you think there should be additional support services available for individuals and families affected by haemoglobinopathies? If yes, what kind of support do you think would be helpful?
6. On a scale of one to five, please indicate your level of confidence in your knowledge about haemoglobinopathy screening?
