# Supplementary material
Source: Research Square preprint supplement (doi:10.21203/rs.3.rs-8831037/v1)
Supplement: Supplementary file 2 [file eb35ec0029712343f3b2d655.xlsx]

## Sheet: Summary
Assessing public understanding of haemoglobinopathy screening
8. Age
	Responses:	55
Option	Count	Percentage
a.) 18-24	4	0.07
b.) 25-29	8	0.15
c.) 30-34	8	0.15
d.) 35-39	15	0.27
e.) 40-44	14	0.25
f.) 45-49	4	0.07
g.) 50+	2	0.04
9. Ethnic Origin
	Responses:	55
Option	Count	Percentage
a.) African/African-Caribbean	39	0.71
b.) Indian sub-continent (Pakistan, India, Bangladesh)	4	0.07
c.) Middle East	0	0
d.) Southeast Asia & China	3	0.05
e.) White European	7	0.13
f.) West Asia	0	0
Other (please state)	2	0.04
10. Kindly state the town or city in which you live.
	Responses:	55
Response
Wolverhampton
Birmingham
Dudley
Walsall
Wolverhampton
Wolverhampton
Wolverhampton
Wolverhampton
Buckinghamshire
Wolverhampton
Warwick
Wolverhampton
Wolverhampton
West Bromwich
Birmingham
Wolverhampton
Wolverhampton
Dudley
Wolverhampton
Wolverhampton
Wolverhampton
Telford
Wolverhampton
Wolverhampton
Wolverhampton
Wolverhampton
Wolverhampton
Wolverhampton
Lagos
Wednesbury
Oldbury
Walsall
Wolverhampton
Wolverhampton
Bloxwich
Dudley
West Midlands
Wolverhampton
Wolverhampton
West bromwhich
Chatham
Coventry
Coventry
Coventry
Walsall
Birmingham
Wolverhampton
Walsall
Birmingham
Birmingham
Birmingham
Wolverhampton
Birmingham
Wolverhampton
Wolverhampton
11. Gender
	Responses:	55
Option	Count	Percentage
a.) Female	46	0.84
b.) Male	9	0.16
c.) I do not wish to disclose	0	0
12. To your knowledge, have you or your partner ever been tested for haemoglobinopathy?
	Responses:	54
Option	Count	Percentage
Yes	19	0.35
No	35	0.65
13. Are there any children in your household?
	Responses:	55
Option	Count	Percentage
Yes	39	0.71
No	16	0.29
14. In the past ten years, have you or your partner been pregnant?
	Responses:	55
Option	Count	Percentage
Yes	33	0.6
No	22	0.4
15. Do you believe that you have a good understanding of what haemoglobinopathies are and why screening for them is important?
	Responses:	55
Option	Count	Percentage
Yes	29	0.53
No	18	0.33
Don't know	8	0.15
16. Do you think there should be more education about haemoglobinopathy screening in schools and communities?
	Responses:	55
Option	Count	Percentage
Yes	55	1
No	0	0
Don't know	0	0
17. Haemoglobinopathies frequently affect diverse groups. Sickle cell disease and thalassaemia are more prevalent in certain groups, e.g., those of African, Asian, or Mediterranean heritage. If haemoglobinopathy risk is considered minimal in a particular ethnic group, do you think screening would still be beneficial?
	Responses:	55
Option	Count	Percentage
Yes	52	0.95
No	1	0.02
Don't know	2	0.04
18. Have you ever participated in a genetic counselling session related to haemoglobinopathies?
	Responses:	55
Option	Count	Percentage
Yes	8	0.15
No	45	0.82
Don't know	2	0.04
19. Do you think early diagnosis of haemoglobinopathies is essential for effective management?
	Responses:	55
Option	Count	Percentage
Yes	49	0.89
No	2	0.04
Don't know	4	0.07
20. Do you believe that haemoglobinopathies screening is important for public health?
	Responses:	55
Option	Count	Percentage
Yes	54	0.98
No	0	0
Don't know	1	0.02
21. Do you understand the purpose of genetic screening for haemoglobinopathies?
	Responses:	55
Option	Count	Percentage
Yes	36	0.65
No	13	0.24
Don't know	6	0.11
22. In the West Midlands region, almost 2% of pregnancies are affected by haemoglobinopathies, resulting in every pregnant mother being tested for haemoglobinopathies unless the mother declines. Do you agree with this strategy?
	Responses:	54
Option	Count	Percentage
Yes	42	0.78
No	0	0
Don't know	12	0.22
23. Do you feel adequately informed about the process of haemoglobinopathy screening?
	Responses:	55
Option	Count	Percentage
Yes	17	0.31
No	33	0.6
Don't know	5	0.09
24. Would you be willing to participate in community events or discussions about haemoglobinopathy screening?
	Responses:	55
Option	Count	Percentage
Yes	32	0.58
No	5	0.09
Maybe	18	0.33
25. Do you believe there should be a specific age at which haemoglobinopathy screening could be implemented?
	Responses:	55
Option	Count	Percentage
Yes	27	0.49
No	16	0.29
Don't know	12	0.22
26. In some countries, couples considering starting a family undergo haemoglobinopathy screening to assess the risk of passing on these hereditary conditions to their children. Would this be beneficial in United Kingdom?
	Responses:	54
Option	Count	Percentage
Yes	49	0.91
No	0	0
Don't know	5	0.09
27. How can public health officials and healthcare providers strengthen their education and awareness campaigns to increase the general public's comprehension of haemoglobinopathy screening, especially among at-risk groups and ethnic communities?
	Responses:	38
Response
With more information on it
Continuous awareness
I Think GP or nurse or social media can tell peoples more about Haemoglibinopathy Thank you
Don't know
NA
By early awareness in schools churches and on social media
More literature published in different languages- mobile clinics, talks in local communities - places of worship, schools, libraries etc- tv advertisements. Educating midwives and those who may naturally deliver information
Radio & Television, Social Media Campaigns, Workplace campaigns, School programs, Health Fairs & Workshops, Community Organisation.
Create more public engagement through social/community forums like churches, mosques and institutions.
Go into schools and colleges and give talks and classes
I think sensitisation of the general public, through local GP and community health centre.
I don’t know.
Television Social media campaign
Better awareness and information given at pregnancy booking and family planning clinics
By public awareness
Through awareness programs and campaigns. By speaking with individuals from those communities/backgrounds as they will be most likely to understand how best to improve awareness and education. There needs to be investment to get these programs off the ground.
More people needs to be enlighten and educated to understand the importance and impact.
To conduct a public awareness through health promotion to reach the target at- risk group. Using posters, flyers, handbills and media campaign
Advertising and self awareness
Through advertising Education
Self- awareness, advertising
Social media
Public Partitions via a social media, More quick surreys and information that share the impacts on the younger generation (18-25)
Talks in schools, incorporated into educational curriculum, public awareness advertising
Better Info distribution
Public health officials and healthcare providers can strengthen education and awareness campaigns by tailoring messages to different languages and cultures, partnering with community leaders, using multiple media channels, providing clear and simple information, offering community workshops, and integrating screening information into broader health programs. They should also ensure easy access to…
Information dissemination
Government should provide fundings.
Do more courses that are beneficial
By increasing awareness
Using social media to create more awareness.
Routine and frequent education via symposium and in schools
Social media Community sensitization programmes
Radio and television,social media campaign etc
Through awareness and education
As a mother, my worst fear is something bad happening to my children. Catch them with oxytocin!!
Public sensitization justb
Increase in campaign about the awareness of haemoglobinopathy
28. Can you share any concerns or questions you have about haemoglobinopathy screening, or any barriers you think the public might face in accessing it?
	Responses:	34
Response
None
Lack of awareness
None
NA
What can one do to eradicate this Completely and to prevent it from reoccurring again.
Fear of results so not willing to participate in testing. Ignorance to conditions and how it affects people.
Why is screening important? What does the screening process involve? Is the screening safe? What happens if a disorder is detected? (Barriers: Lack of awareness, Cultural and Language Barriers, Fear and Stigma, Cost, Accessibility).
How exactly does it affect people's daily life?
People may feel they are not at risk of complications so may feel it’s not necessity
None at the moment.
It may be human error or Morden equipment.
Is the procedure safe? Barriers: cost , fear and stigma
Only by visiting the hospital
There seems to be a mistrust or paranoia related public health such as seen by the anti-vax movement. Education and developing relationships is key to overcoming any ignorance.
Barriers may be cultural,religion and language
Lack of awareness and understanding
The concern is that many people may be at risk but do no t know. Or those whose cultural disposition or religious beliefs is a barrier to assessing information or treatments. Intervention should incorporate community focus group to reach and penetrate the above category of people
Na
Deley
The public face barriers against receiving help as this topic is not discussed enough
NA
Concerns about haemoglobinopathy screening include understanding what the conditions are, the accuracy of the test, confidentiality of results, and potential stigma. Barriers to accessing screening include lack of awareness, cultural and language differences, financial constraints, geographical access issues, and distrust in the healthcare system.
None
No questions
None
I dont know
None
Willingness of people to adhere to guidelines
Risk maybe higher in sickle cell carrier individuals
Why is screening important? What dose the screening process involve? Is. The screening safe
Not knowing where to ne sign posted to and lack of knowledge
If this issue impacted white people, everyone would be aware!
Just want a deeper knowledge and how it is being carried out to help people
None at the moment
29. Have you or anyone you know ever undergone haemoglobinopathy screening? If yes, can you share your experience or what you've heard about the process?
	Responses:	34
Response
I've had it when I was a child so I can't remember
It was a seamless process. Had blood drawn and tested and result sent
No
NA
I am not quite sure about this
Cannot remember if baby tested for it when born?
Yes I have. I knew since I was 12 years old that I was AS. Before starting any relationships, I would ask my partner his genotype. Before marriage, we went for screening to make sure there were no errors in our status.
Can't say
No
My cousin son went through the process it was diagnose of Haemophilia B
No
No
N/a
No, not atall
No
No
No
Na
No
No
No
No
No
Yes my friend went. And he is okay with that.
No
No
I did mine before relocating to uk.
No
No
No
Cant remember
My partner has thelassemia but it doesn’t seem to impact him much - he has dodgy red blood cells that impairs his immune system and that’s all I know to be honest.
I don't know
None at the moment
30. How do you think we can address any stigma or fear associated with haemoglobinopathy screening in United Kingdom?
	Responses:	34
Response
Educate people
Public education and awareness
Don't know
NA
By creating more awareness
Raising awareness
Education and Awareness Campaigns, Community Engagement, Positive Messaging, Support Services, Accessible and Convenient Screening.
Confidentiality
Education so the public understands it’s important
Yes.
More awareness.
Positive messaging Education and Awareness campaigns
Bu creating public awareness
Awareness campaigns that involve real life stories and case studies. Something that people will be able to relate to.
By addressing the barriers
Provide information and counselling also educate the public.
More awareness of how important screening is
Awareness Education
Fast
Yes by doing surveys that asks peoples options on why they may shy away from these types of tests
Education and positive public awareness campaigns
To address stigma or fear associated with haemoglobinopathy screening in the United Kingdom, we can implement culturally sensitive education campaigns, ensure confidentiality, involve community leaders to foster trust, provide clear information about the benefits of early detection, and offer robust support services, including genetic counseling and psychological support.
Proper knowledge
Awareness.
Counselling
More awareness and treatment
Awareness is never enough
Forming a peer group or some stuff
None
Awareness campaign and education
Awareness and education
Screening is king! Earlier the better! The future of health isn’t just new cures, it’s prevention due to better testing. You can’t bury your head in the sand.
Public sensitization of the benefits or advantages
Awareness and the right information to the public
31. Do you think there should be additional support services available for individuals and families affected by haemoglobinopathies? If yes, what kind of support do you think would be helpful?
	Responses:	36
Response
Yes
Yes ..moral support
Not sure
NA
Yes, this will help people and the individual affected to be more informed and accountable
Yes- specialised teams to support families - just as diabetic children have the support of diabetic team - not sure if this already available
Medical and Healthcare Support, Genetic Counselling, Community Awareness and Advocacy, Educational Workshops and Resources.
More awareness and easy access to medical facilities
Practical support if needed, if they have and physical or psychological needs
Yes. Group support.
To more information or awareness and reassurance.2”
Genetic counseling Medical and health care support
Yes
Yes, support groups through local/regional organisations. Like macmillan cancer support but for haemoglobinopathies.
Easy access to health facilities not until it becomes emergency situation as prevention is better than cure.
Psychological support. Awareness
Wellbring and emotional support
Additional support for family eg warm pack, financial assistance
Free screening
Financially
Yes
Yes, a support help line, clinic for testing
Centres and communication channels which provide support. Establish and support a department in the NHS
Support groups
Yes, additional support services should be available for individuals and families affected by haemoglobinopathies. Helpful support includes genetic counseling, psychological support, patient education, financial assistance, support groups, and access to specialized healthcare services.
No
Funding
Love, care, assurance
Yes
Yes
Don't know
Yes.
Medical and healthcare support
Educational, mental and financial support
I don't know
Yes, I think there should be additional support for the individual and family affected by haemoglobinopathies. The right support can be put in place by expertise
32. On a scale of one to five, please indicate your level of confidence in your knowledge about haemoglobinopathy screening.
	Responses:	44
Response
1
4
3
4
1
1
2
1
2
2
5 because I am a sickle cell carrier (AS). My daughter is also AS.
4
3
2
3
4
2
3
1
3
3
2
3
4
5
2
3
2
5
3
3
2
1
4
4
1
10
3
3
3
3
1
3
4
